# Supplementary material
Source: publisher figshare collection journal article supplement (https://acs.figshare.com/ndownloader/files/23076779)
Supplement: Supplementary file 1 [file 23076779]

## **Supporting Information**

# Ultrasonic Assisted Synthesis of Size-Controlled Cu-Metal–Organic Framework Decorated Graphene Oxide Composite: Sustainable Electrocatalyst for the Trace-Level Determination of Nitrite in Environmental Water Samples

*P. Arul<sup>a</sup>, N.S.K. Gowthaman<sup>b</sup>, S. Abraham John<sup>a\*</sup> and Hong Ngee Lim<sup>b,c\*</sup>*

<sup>a</sup> Centre for Nanoscience and Nanotechnology, Department of Chemistry  
The Gandhigram Rural Institute  
Gandhigram-624 302, Dindigul, Tamilnadu, India

<sup>b</sup> Materials Synthesis and Characterization Laboratory, Institute of Advanced Technology,  
Universiti Putra Malaysia, 43400 UPM Serdang, Selangor, Malaysia

<sup>c</sup> Department of Chemistry, Faculty of Science, Universiti Putra Malaysia,  
43400 UPM Serdang, Selangor, Malaysia

\*Corresponding Authors

Email: [hongngee@upm.edu.my](mailto:hongngee@upm.edu.my) (H.N. Lim), [abrajohn@yahoo.co.in](mailto:abrajohn@yahoo.co.in) (S.A. John)

**Number of Pages: 11**

**Number of Figures: 8**

**Number of Tables: 2**

| S.No. | Content                                  | Page No.  |
|-------|------------------------------------------|-----------|
| I.    | Additional characterizations and results | S2 to S11 |

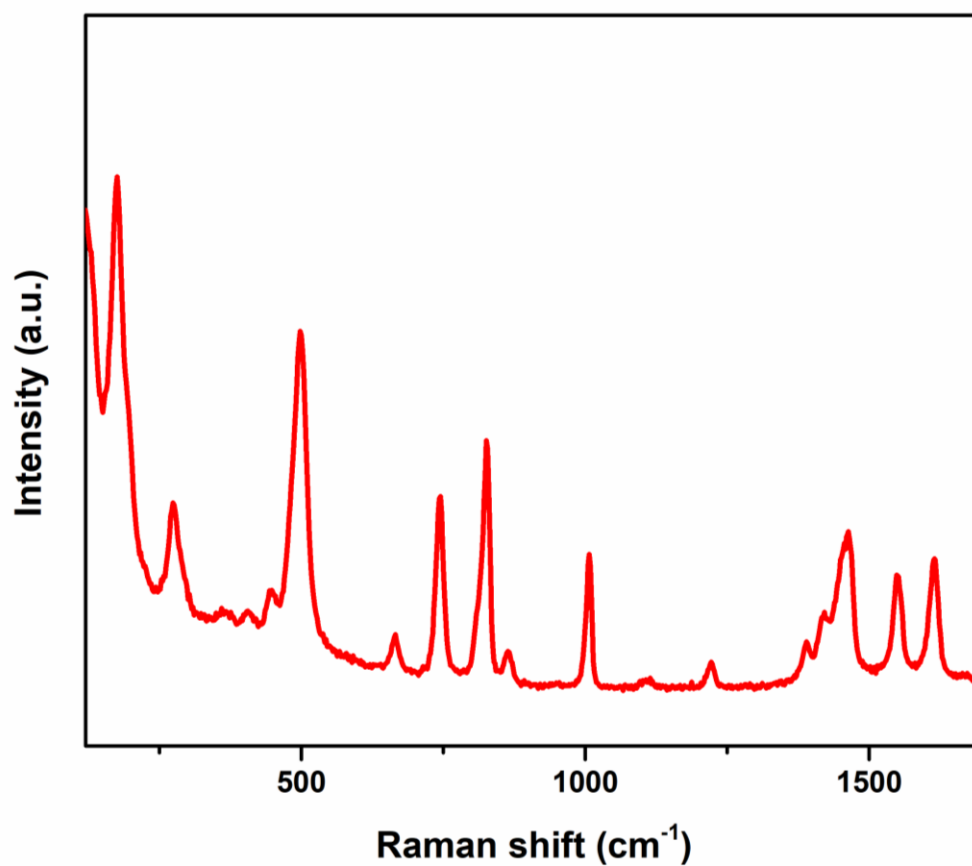

**Figure S1.** Raman spectrum of Cu-MOF-GO.

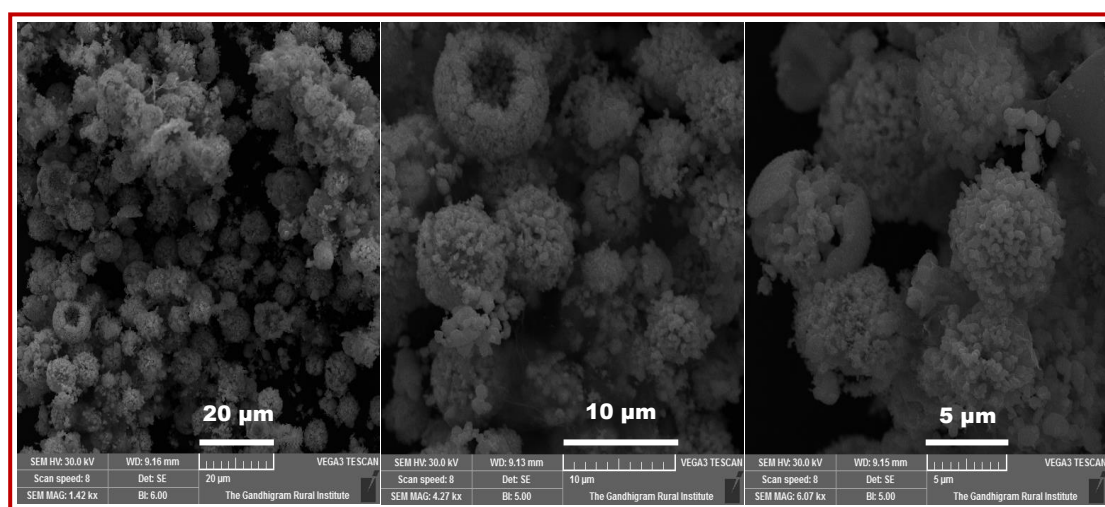

**Figure S2.** SEM images of Cu-MOF-GO in absence of ultrasonication.

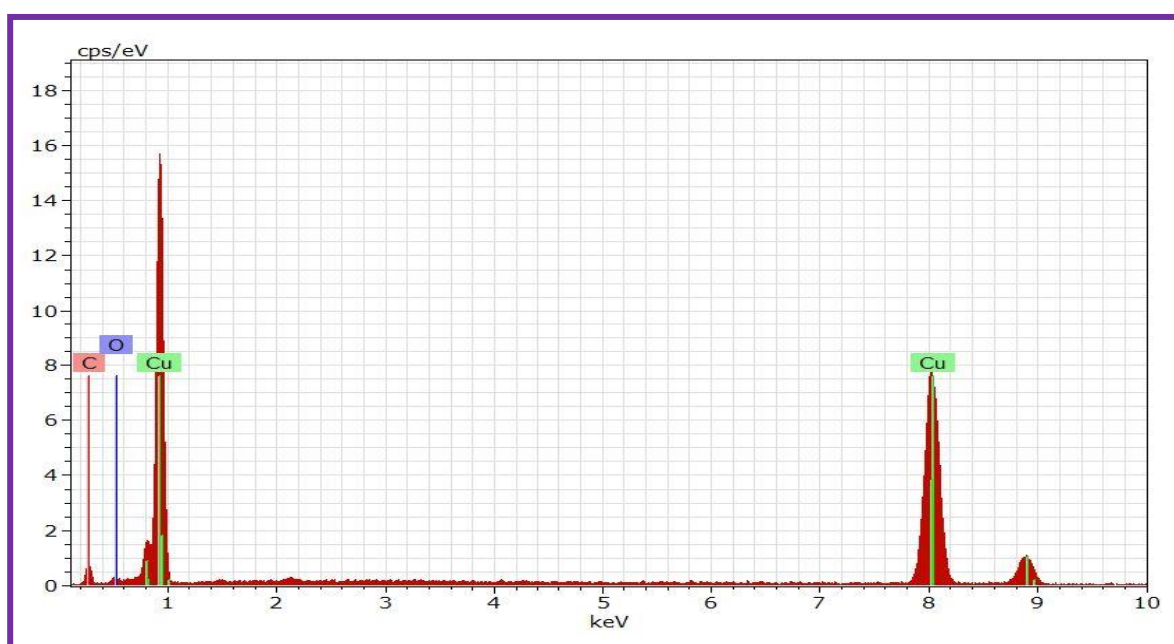

**Figure S3.** EDX spectrum of solid Cu-MOF-GO.

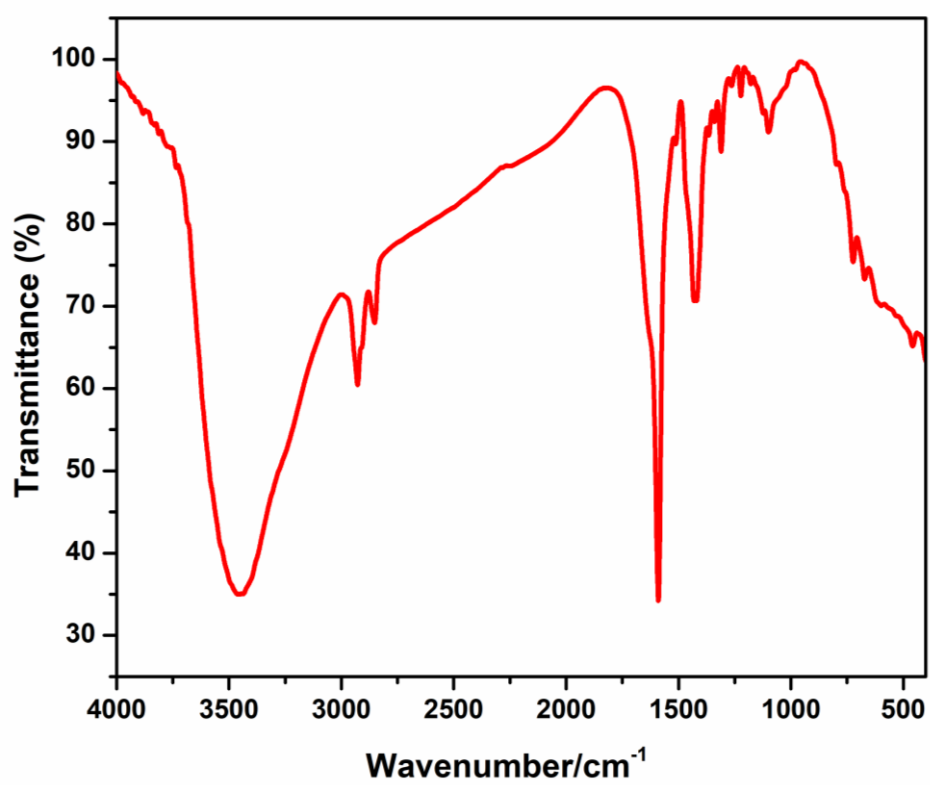

**Figure S4.** ATR-FT-IR spectrum of Cu-MOF-GO on GC film.

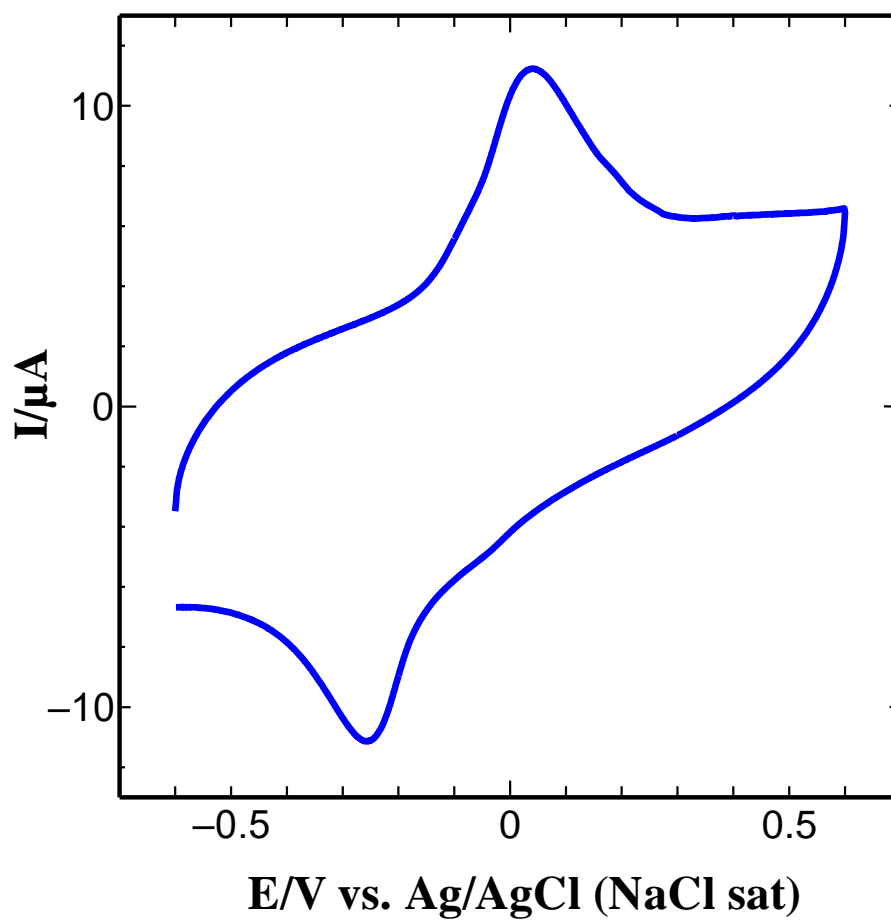

**Figure S5.** CV obtained at Cu-MOF-GO electrode in 0.2 M PB solution (pH 7.2) at a scan rate of 50 mV/s.

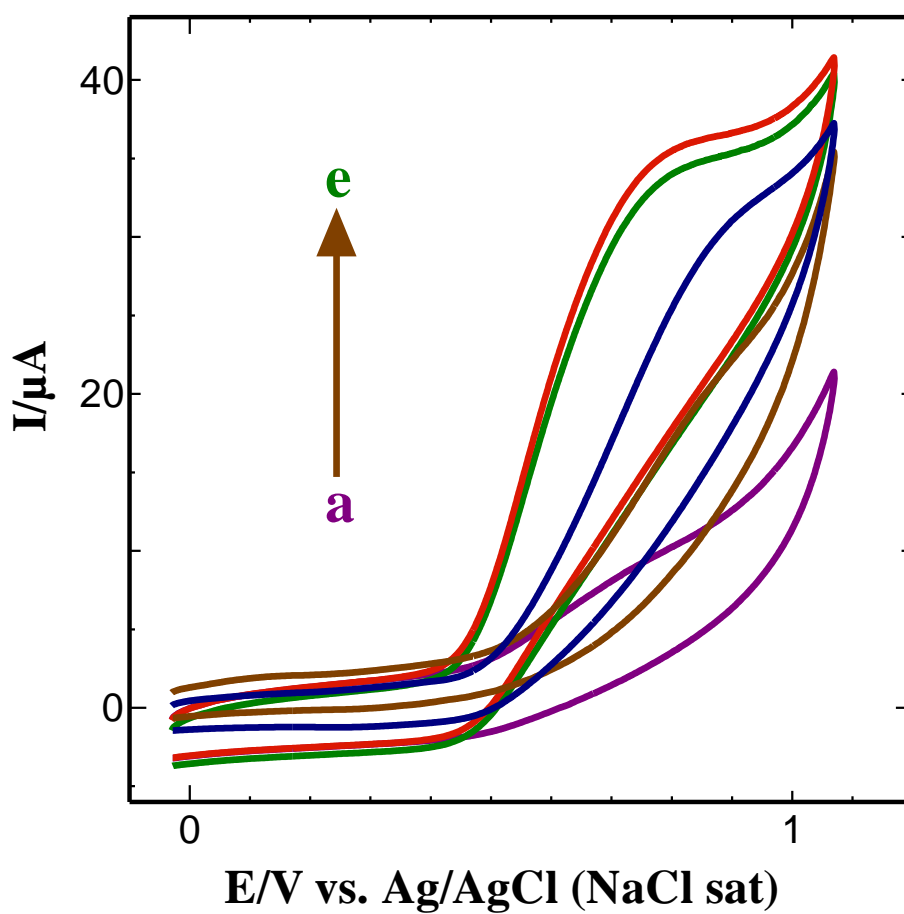

**Figure S6.** CVs obtained for 0.5 mM nitrite at Cu-MOF-GO/GC electrode prepared at different loading level of (a) 1, (b) 2, (c) 3, (d) 4 and (e) 5 mg/mL in 0.2 M PB solution (pH 7.2) at a scan rate of 50 mV/s.

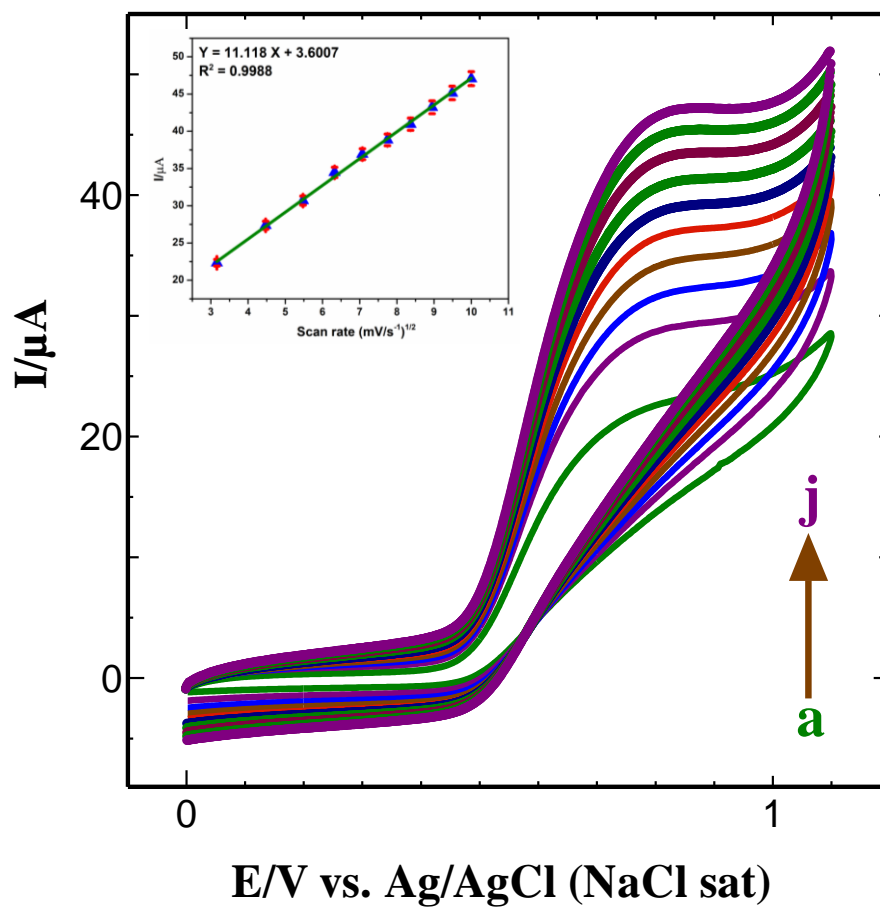

**Figure S7.** CVs obtained for 0.5 mM of nitrite at Cu-MOF-GO/GC electrode in 0.2 M PB solution (pH 7.2) at different scan rates: 10 to 100 mV/s (a-j). **Inset:** plot of current vs. square root of scan rate.



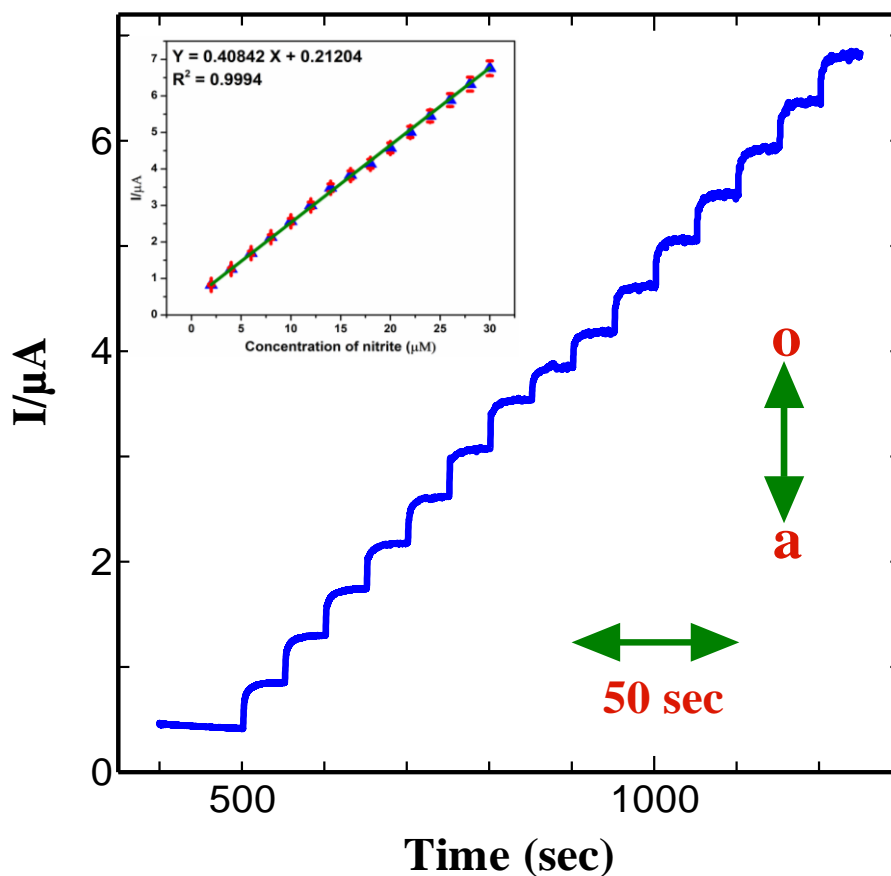

**Figure S8.** Amperometric i-t curve for the determination of nitrite at Cu-MOF-GO modified GC electrode in 0.2 M PB solution (pH 7.2) at an applied potential of +1.0 V. Each increment of 2  $\mu\text{M}$  nitrite (a-o) at a regular interval of 50 s. ***Inset:*** plot of current vs. concentration of nitrite.

| Wavenumber/cm <sup>-1</sup> |               |      |               | Peak Assignments                         |
|-----------------------------|---------------|------|---------------|------------------------------------------|
| AZA                         | Cu-MOF        | GO   | Cu-MOF-GO     |                                          |
| -                           | 614           | -    | 626           | Metal stretching vibration of Cu-O       |
| 677                         | -             | -    | -             | Bending vibration of -CH                 |
| 724                         | 725           | -    | 716           | -C-H out plane bending vibration         |
| 1086                        | 1101          | 1090 | 1107          | Stretching vibration of -C-O-            |
| 1420                        | 1436          | 1387 | 1422          | -OH bending vibration                    |
| -                           | 1492          | -    | 1495          | Stretching vibration of -CH <sub>2</sub> |
| 1703                        | -             | 1634 | -             | Conjugated C=O stretching                |
| 2936                        | 2847 and 2929 | -    | 2848 and 2922 | -C-H stretching vibration                |
| 3440                        | 3448          | 3459 | 3432          | -OH stretching vibration                 |

**Table S1.** FT-IR spectral data and their assignments for powder AZA, Cu-MOF, GO and Cu-MOF-GO.

| Sample              | Added<br>(nitrite, $\mu\text{M}$ ) | Present method          |              |
|---------------------|------------------------------------|-------------------------|--------------|
|                     |                                    | Found ( $\mu\text{M}$ ) | Recovery (%) |
| Lake water          | 0                                  | -                       | -            |
|                     | 5                                  | 4.98                    | 99.6         |
|                     | 10                                 | 14.96                   | 99.8         |
|                     | 20                                 | 34.92                   | 99.8         |
|                     | -                                  | 2.30                    | -            |
| Industrial effluent | 5                                  | 7.27                    | 99.6         |
|                     | 10                                 | 17.23                   | 99.7         |
|                     | 20                                 | 37.18                   | 99.8         |
|                     | -                                  | -                       | -            |

**Table S2.** Determination of nitrite in lake and industrial effluent samples using Cu-MOF-GO modified electrode.
